# Supplementary material for: Comparative Anticancer Potential of Green Tea Extract and Epigallocatechin-3-gallate on Breast Cancer Spheroids
Source: MDPI journal article supplement (doi:10.3390/foods13010064), 2023-12-23
Supplement: s1 [file s1]

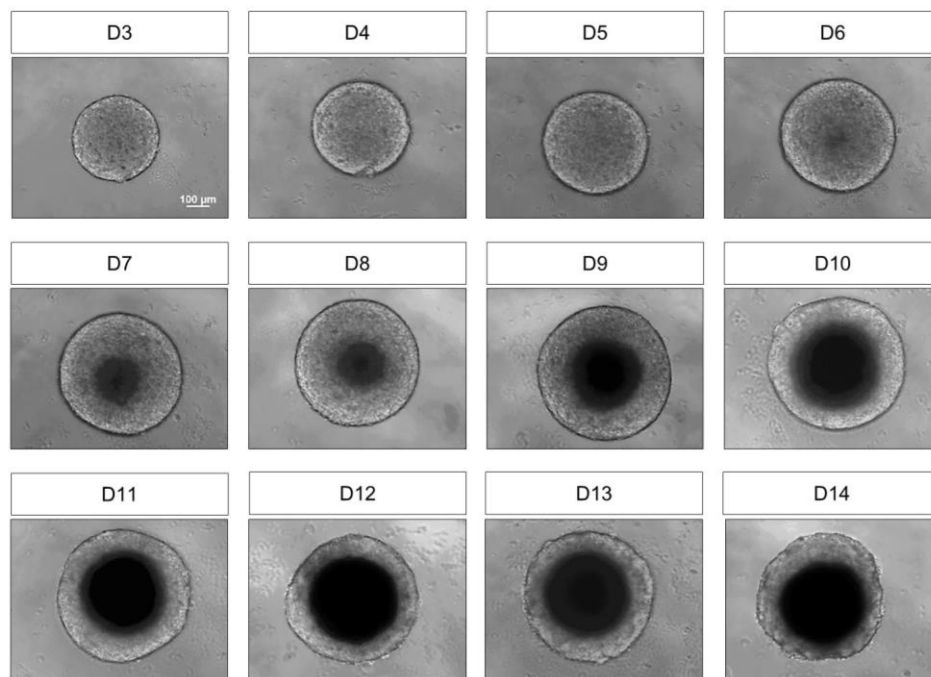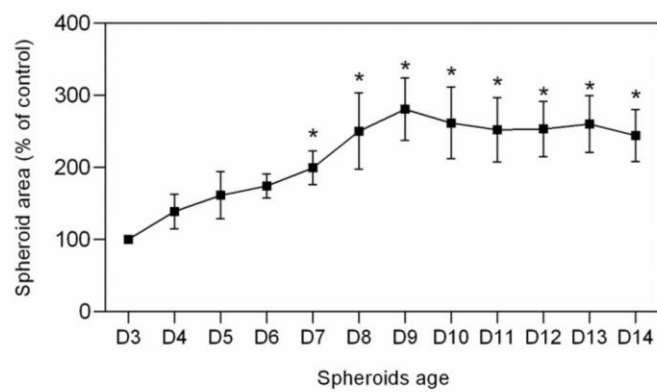

**Figure S1.** MCF-7 spheroids' growth pattern:  $5.0 \times 10^3$  cells/mL were seeded by centrifugation in agarose-coated plates. The spheroids were followed up for 2 weeks, and the images were captured every 24 h. Image areas were quantified using ImageJ® software, areas of spheroids were quantified, and symbol \* ( $p < 0.05$ ) indicates a significant difference compared to the third day (D3). Scale bars: 100  $\mu$ m. Assays were performed in triplicate on three independent experiments.

**Table S1:** Chemical composition of the GTE

| Compound                          | Content (mg/g) |
|-----------------------------------|----------------|
| Catechin (C)                      | 4.7 ± 0.08     |
| Epicatechin gallate (ECG)         | 7.8 ± 0.03     |
| Epigallocatechin (EGC)            | 28.6 ± 0.02    |
| Epigallocatechin-3-gallate (EGCG) | 28.4 ± 0.1     |
| Σ catechins                       | 69.5 ± 0.08    |
